# Supplementary material for: UBL4A inhibits autophagy-mediated proliferation and metastasis of pancreatic ductal adenocarcinoma via targeting LAMP1
Source: PubMed Central journal article supplement (PMC6617940; doi:10.1186/s13046-019-1278-9), 2019-07-09

**a**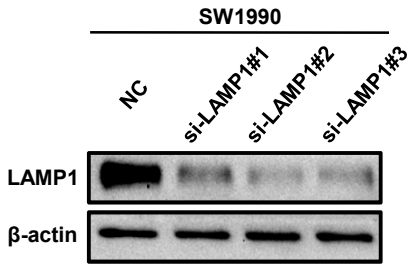**b**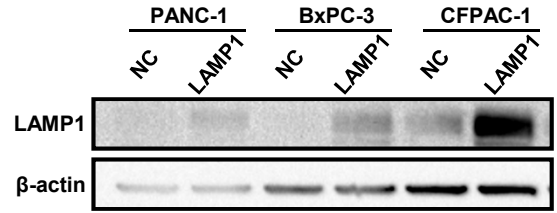**c**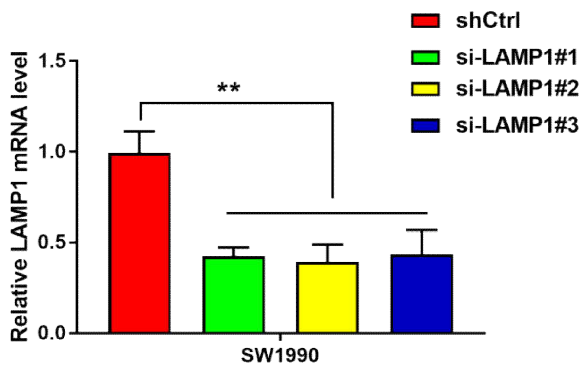**d**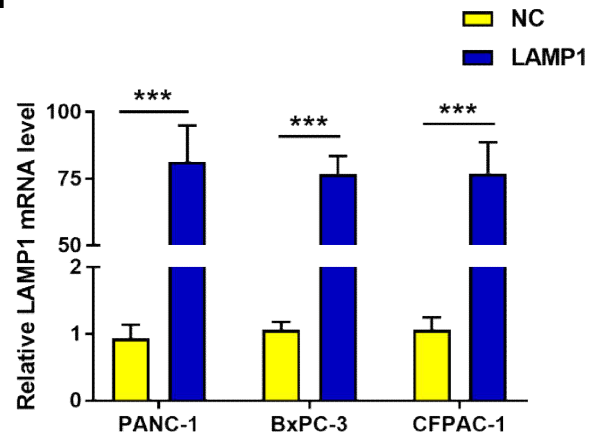**e**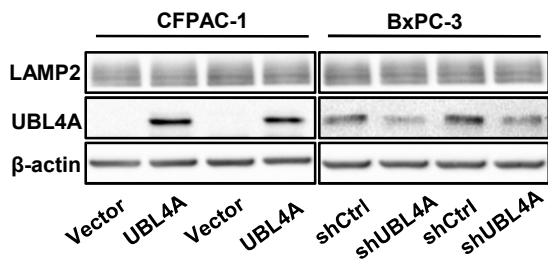

Supplement: 13046_2019_1278_MOESM8_ESM.pdf [file 13046_2019_1278_MOESM8_ESM.pdf]
