# Supplementary material for: UBL4A inhibits autophagy-mediated proliferation and metastasis of pancreatic ductal adenocarcinoma via targeting LAMP1
Source: Springer Nature journal article supplement (doi:10.1186/s13046-019-1278-9), 2019-07-09

**a**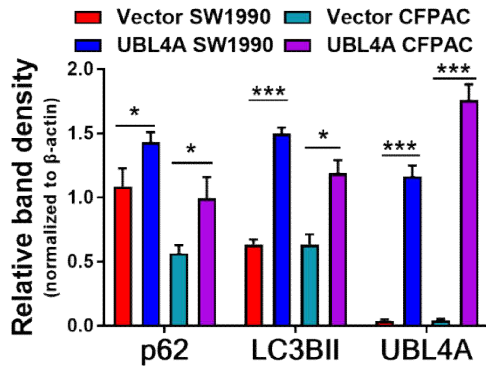**b**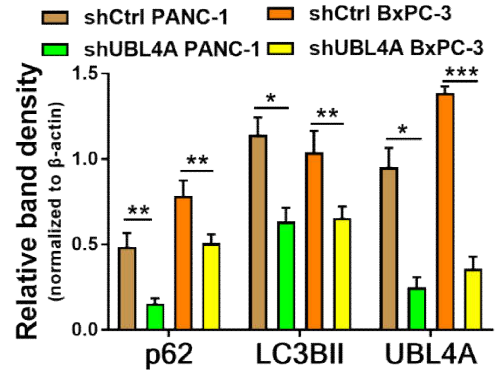**c**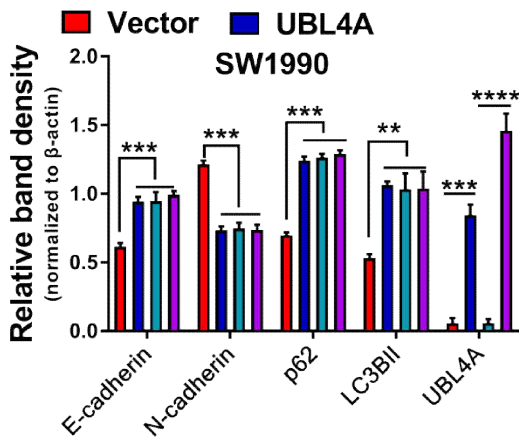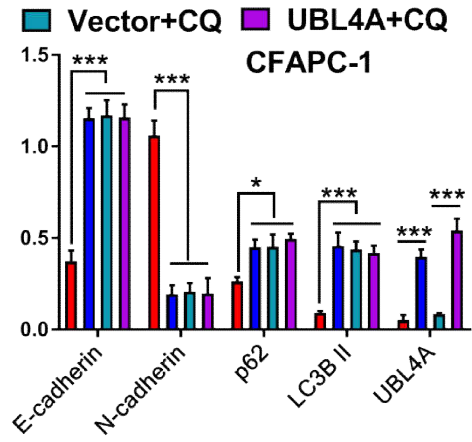**d**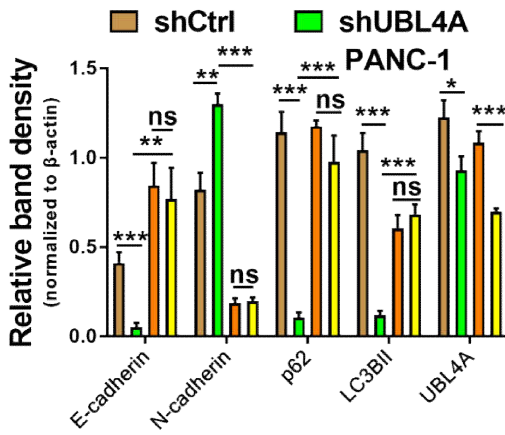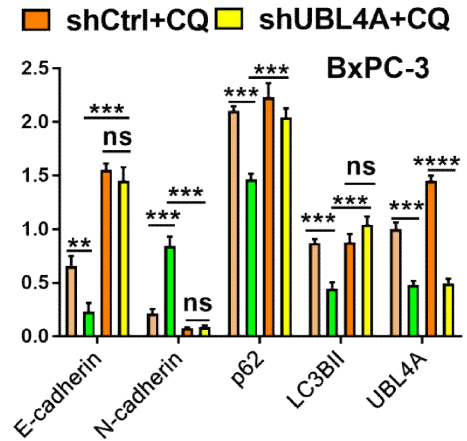

Supplement: MOESM5 [file 16910652]
